# Supplementary material for: The calcilytics Calhex-231 and NPS 2143 and the calcimimetic Calindol reduce vascular reactivity via inhibition of voltage-gated Ca2+ channels
Source: PubMed Central journal article supplement (PMC5127511; doi:10.1016/j.ejphar.2016.10.008), 2016-11-15

# Supplementary Figure 1

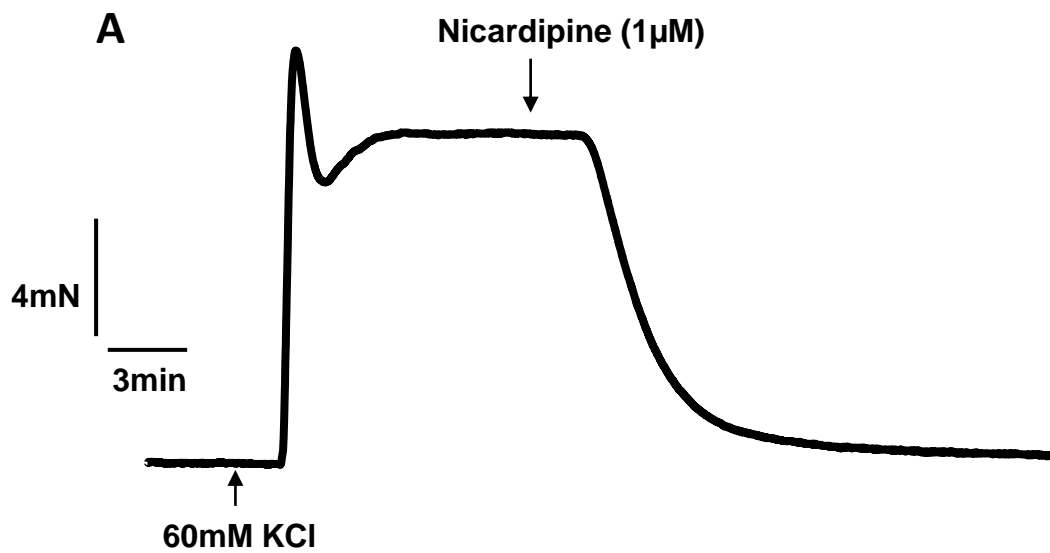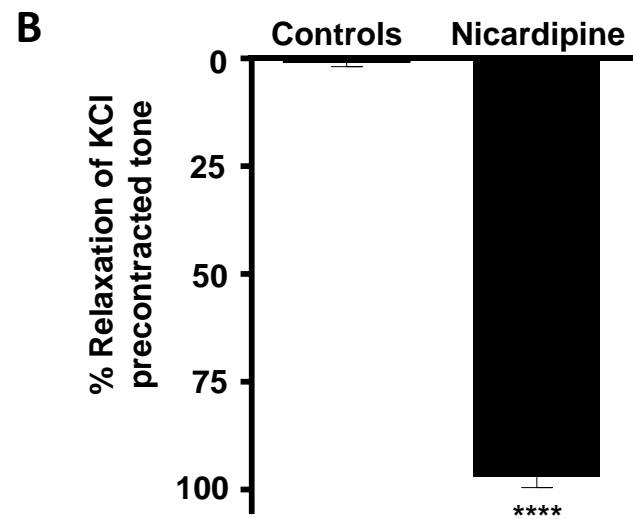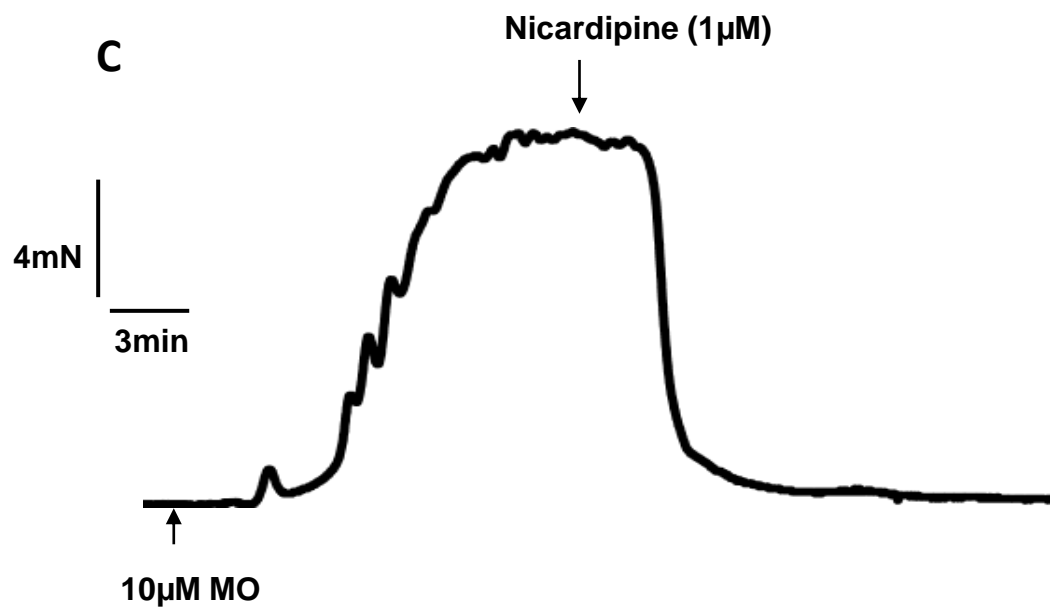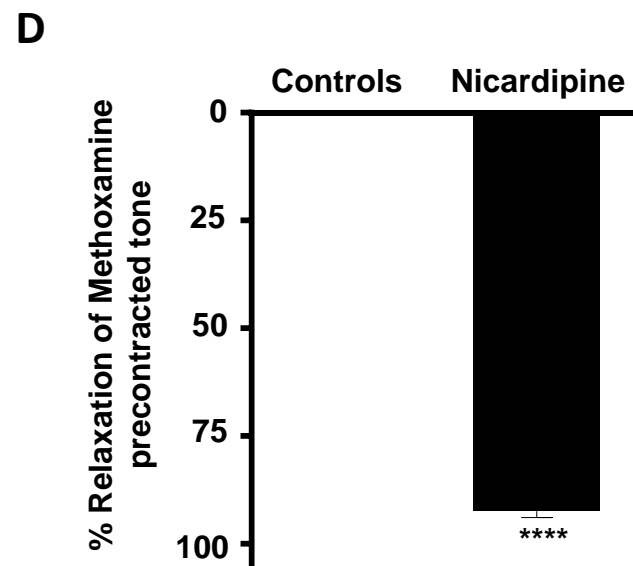

Supplement: mmc1.pdf [file mmc1.pdf]
